# Supplementary material
Source: PubMed Central journal article supplement (PMC10623265)
Supplement: JTCM-43-6-1140-s1.pdf [file JTCM-43-6-1140-s1.pdf]

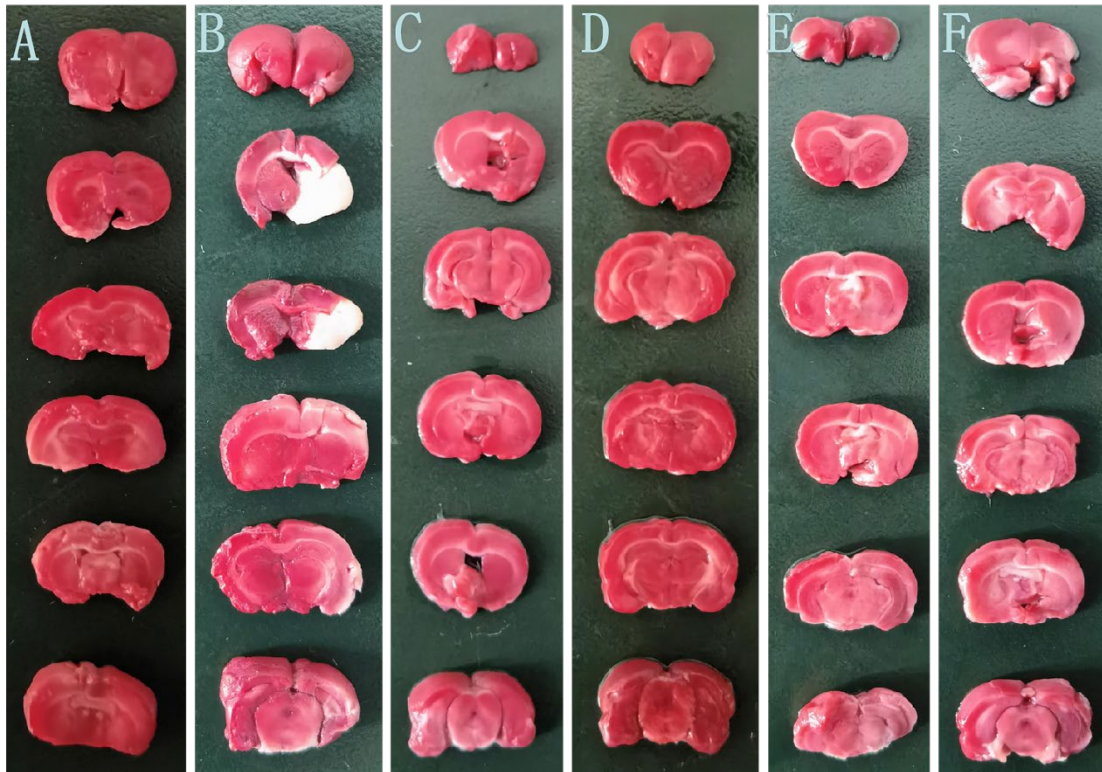

Supplement Figure 1 Effect of NLXT and its split prescriptions on the cerebral infarction area in the experimental rats (TTC staining)

A-F: typical image showing pathological sections. A: Sham group (saline, 14 d); B: Model group (saline, 14 d); C: Nimodiping group (8.1 mg/kg, 14 d); D: Naoluoointong group (7.2 g/kg, 14 d); E: Yiqi group (2.7 g/kg, 14 d); F: Huoxuetongluo group (4.5 mg/kg, 14 d). NLXT: Naoluoointong formula; TTC: triphenyltetrazolium chloride.
